# Supplementary material
Source: PubMed Central journal article supplement (PMC4941956)
Supplement: NIHMS787028-supplement-supplementary_table_1.pdf [file NIHMS787028-supplement-supplementary_table_1.pdf]

| Molar ratio of FC <sub>4</sub> S:NADH | Sum of L<br>(50 μs, x10 <sup>5</sup> ) | Max of L<br>x10 <sup>4</sup> | τ <sub>D</sub><br>(μ s) | k <sub>obs</sub><br>(s <sup>-1</sup> , x10 <sup>4</sup> ) | τ <sub>T</sub><br>(μ s) | ks<br>(s <sup>-1</sup> , x10 <sup>6</sup> ) |
|---------------------------------------|----------------------------------------|------------------------------|-------------------------|-----------------------------------------------------------|-------------------------|---------------------------------------------|
| A (1:0)                               | 2.4 (100)                              | 2.7 (100)                    | 13.3                    | 7.5 (k <sub>d</sub> )                                     | 0.31                    | 3.3                                         |
| B (1:1)                               | 2.4 (100)                              | 2.9 (107)                    | 12.1                    | 8.4                                                       | 0.32                    | 3.1                                         |
| C (1:10)                              | 2.3 (95)                               | 2.7 (99)                     | 12.4                    | 8.1                                                       | 0.35                    | 2.9                                         |
| D (1:50)                              | 1.8 (76)                               | 2.5 (93)                     | 10.3                    | 9.7                                                       | 0.29                    | 3.4                                         |
| E (1:100)                             | 1.6 (67)                               | 2.6 (96)                     | 8.5                     | 11.7                                                      | 0.33                    | 3.1                                         |
| F (1:125)                             | 1.5 (62)                               | 2.6 (96)                     | 7.8                     | 12.8                                                      | 0.36                    | 2.8                                         |
| G (1:250)                             | 1.0 (41)                               | 2.4 (87)                     | 5.3                     | 19.0                                                      | 0.32                    | 3.1                                         |
| H (1:500)                             | 0.7 (27)                               | 2.1 (76)                     | 3.6                     | 28.2                                                      | 0.30                    | 3.3                                         |
| I (1:1000)                            | 0.4 (16)                               | 1.7 (61)                     | 2.4                     | 42.2                                                      | 0.24                    | 4.3                                         |
